# Supplementary material for: Analysis of a wild mouse promoter variant reveals a novel role for FcγRIIb in the control of the germinal center and autoimmunity
Source: PubMed Central journal article supplement — J Exp Med. 2012 Nov 19;209(12):2307–19. doi: 10.1084/jem.20121752 (PMC3501356; doi:10.1084/jem.20121752), 2012-11-19
Supplement: supp_jem.20121752_JEM_20121752_sm.pdf [file supp_jem.20121752_JEM_20121752_sm.pdf]

## SUPPLEMENTAL MATERIAL

Espéli et al., <http://www.jem.org/cgi/content/full/jem.20121752/DC1>

Table S1. Primer list

| Name                                 | Sequence                                                           |
|--------------------------------------|--------------------------------------------------------------------|
| <b>mFcr2b cloning</b>                |                                                                    |
| Luci1B1 forward                      | 5'-AAAGCTAGCAATTCAGATAAGAGCTGGCA-3'                                |
| Luci1B9 reverse                      | 5'-AAAAGATCTATGGGGATCAGTAGGAACGG-3'                                |
| <b>Mutagenesis WT to KI/NZB</b>      |                                                                    |
| T <sub>-161</sub> C forward          | 5'-AGACCAGGGAGCCAGAC <u>G</u> TTCTCAGAAGTTCTG-3'                   |
| T <sub>-161</sub> C reverse          | 5'-CAGAACTTCTGAGAAC <u>G</u> TCTGGCTCCCTGGTCT-3'                   |
| G <sub>-79</sub> C forward           | 5'-GCCATAGCAGTGAGAA <u>C</u> AGTAAGTAGTGCAGTG-3'                   |
| G <sub>-79</sub> C reverse           | 5'-CACTGCACTACTTACT <u>G</u> TTCTCACTGCTATGGC-3'                   |
| C <sub>-59</sub> T forward           | 5'-AAGTAGTGCAGTGGGG <u>I</u> GGGGGAGGGATTACAGG-3'                  |
| C <sub>-59</sub> T reverse           | 5'-CCTGAATCCCTCC <u>C</u> CCACTGCCTACTT-3'                         |
| A <sub>-19</sub> C forward           | 5'-CACAGACCGATGCTCG <u>T</u> AGGTACTTACAGAGG-3'                    |
| A <sub>-19</sub> C reverse           | 5'-CCTCTGTAAGTACCTAG <u>C</u> GAGCATCGGTCTGTG-3'                   |
| GG <sub>-1/+2</sub> AA forward       | 5'-CGATAGGTACTTACAGAGGA <u>A</u> CAAGTGGAGAGGAATGTATGTG-3'         |
| GG <sub>-1/+2</sub> AA reverse       | 5'-CACATACATTCCTCTCCACT <u>I</u> G <u>I</u> TCTCTGTAAGTACCTATCG-3' |
| <b>Mutagenesis KI/NZB to WT</b>      |                                                                    |
| C <sub>-79</sub> G forward           | 5'-GCCATAGCAGTGAGAA <u>G</u> AGTAAGTAGTGCAGTG-3'                   |
| C <sub>-79</sub> G reverse           | 5'-CACTGCACTACTTACT <u>T</u> TTCTCACTGCTATGGC-3'                   |
| AA <sub>-1/+2</sub> GG forward       | 5'-CGATAGGTACTTACAGAGGA <u>G</u> CGAGTGGAGAGGAATGTATGTG-3'         |
| AA <sub>-1/+2</sub> GG reverse       | 5'-CACATACATTCCTCTCCACT <u>C</u> GCTCTCTGTAAGTACCTATCG-3'          |
| <b>ChIP PCR</b>                      |                                                                    |
| I1b ChIP forward                     | 5'-TCTCAGAAGTTCTGGTGCCCA-3'                                        |
| I1b ChIP reverse                     | 5'-CTCTGTAAGTACCTATCGAGCATCGGT-3'                                  |
| <b>Single cell nested PCR</b>        |                                                                    |
| V <sub>H</sub> 186.2 forward 1       | 5'-GCTGTATCATGCTCTTCTTG-3'                                         |
| V <sub>H</sub> 186.2 forward 2       | 5'-GGTGTCCACTCCCAGGTCCA-3'                                         |
| C <sub>γ</sub> 1 reverse 1           | 5'-GGATGACTCATCCCAGGGTCACCATGGAGT-3'                               |
| C <sub>γ</sub> 1 reverse 2           | 5'-CCAGGGGCCAGTGGATAGAC-3'                                         |
| <b>Fcgr2b promoter analysis</b>      |                                                                    |
| mGRII53(-384)                        | 5'-TGCAATCTCAGTATCCTGCAG-3'                                        |
| mGRII53(-349)                        | 5'-GCTCAAGCCTGAGGTTAC-3'                                           |
| mGRII35(87)                          | 5'-CTCACTGTTGGATTGTAGACC-3'                                        |
| mGRII35(22)                          | 5'-TCACATACATTCCTCTCC-3'                                           |
| <b>Polymorphic region 3 analysis</b> |                                                                    |
| 4111                                 | 5'-GTGTGCGTTCTCACTTGCTGC-3'                                        |
| 4179                                 | 5'-GGTGGCGGCATATTCTGGA-3'                                          |
| <b>Polymorphic region 4</b>          |                                                                    |
| 4895                                 | 5'-GGACAGGTGCATAAACACAC-3'                                         |
| 5006                                 | 5'-GAGCGCCATGCATGTGTAT-3'                                          |

Point mutations are underlined.

**Table S2.** List of antibodies and molecules used for flow cytometry and immunohistology

| Antibody or molecule                    | Clone       | Supplier               |
|-----------------------------------------|-------------|------------------------|
| <b>Flow cytometry</b>                   |             |                        |
| Anti-CD138                              | 281-2       | BD                     |
| Anti-CD16/32                            | 2.4G2       | BD                     |
| Anti-KI67                               | B56         | BD                     |
| Anti-CD95                               | Jo2         | BD                     |
| Anti-ZAP70 (PY319)/Syk (PY352)          | 17A/P-ZAP70 | BD                     |
| Anti-BLNK (PY84)                        | J117-1278   | BD                     |
| Anti-B220                               | RA3-6B2     | eBioscience            |
| Anti-CD38                               | 90          | eBioscience            |
| Anti-GL7                                | GL7         | eBioscience            |
| PNA-FITC                                |             | Vector Laboratories    |
| NP(32)-PE                               |             | Biosearch Technologies |
| CaspGLOW fluorescein active caspase kit |             | MBL                    |
| Anti-CD4                                | RM4-5       | eBioscience            |
| Anti-CXCR5                              | 2G8         | BD                     |
| Anti-PD1                                | J43         | eBioscience            |
| <b>Immunohistology</b>                  |             |                        |
| Anti-B220 APC                           | RA3-6B2     | eBioscience            |
| Rat anti-mouse CD8                      | 53-6.7      | eBioscience            |
| Goat anti-mouse IgG Alexa Fluor 488     |             | Molecular Probes       |
| Goat anti-mouse IgM                     |             | SouthernBiotech        |
| Rabbit antilaminin                      |             | Sigma-Aldrich          |
| Rabbit anti-mouse KI67                  |             | Abcam                  |
| Goat ant-rat Alexa Fluor 488            |             | Molecular Probes       |
| Donkey anti-rabbit Alexa Fluor 594      |             | Molecular Probes       |
| Donkey anti-goat Alexa Fluor 488        |             | Molecular Probes       |
